# Supplementary material for: Fibroblast activation protein targeted radiotherapy induces an immunogenic tumor microenvironment and enhances the efficacy of PD-1 immune checkpoint inhibition
Source: PubMed Central journal article supplement (PMC10317891; doi:10.1007/s00259-023-06211-6), 2023-04-22
Supplement: 259_2023_6211_MOESM2_ESM.pdf [file 259_2023_6211_MOESM2_ESM.pdf]

A

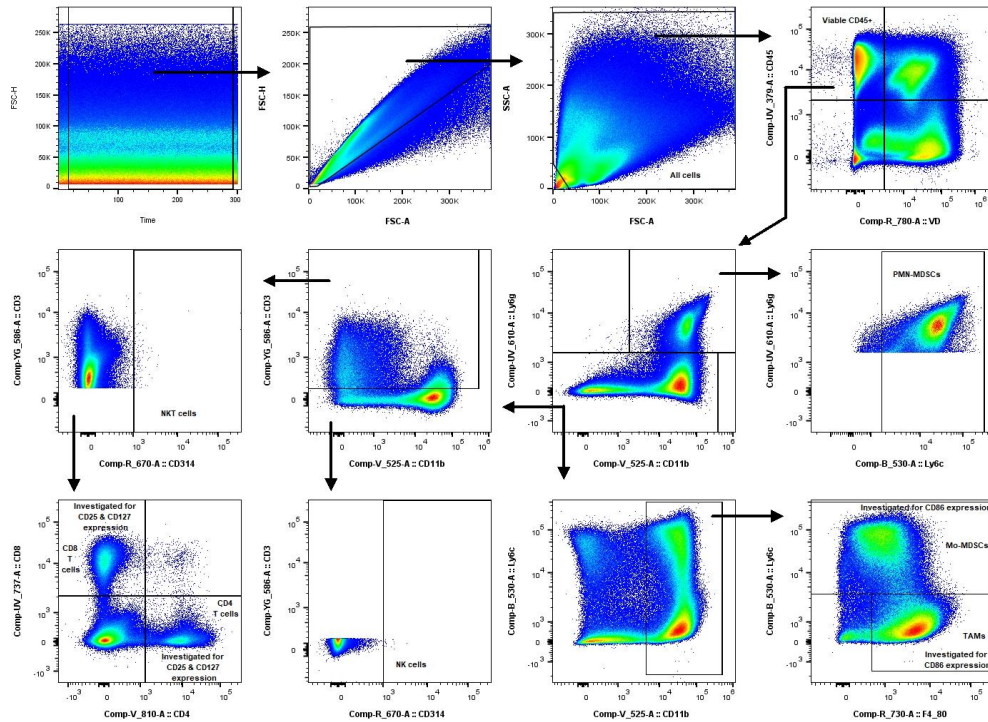

B

| Cells        | Markers                                 |
|--------------|-----------------------------------------|
| Immune cells | CD45+                                   |
| PMN-MDSC     | CD45+ CD11b+ Ly6c+ Ly6g+                |
| Mo-MDSC      | CD45+ CD11b+ Ly6c <sup>high</sup> Ly6g- |
| TAM          | CD45+ CD11b+ Ly6g- F4/80+ Ly6c-         |
| T cells      | CD45+ CD11b- Ly6g- CD3+ CD314-          |
| CD8+ T cells | CD45+ CD11b- Ly6g- CD3+ CD314- CD8+     |
| CD4+ T cells | CD45+ CD11b- Ly6g- CD3+ CD314- CD4+     |

**Supplementary Figure S1. Gating strategy for immune profiling of MCA205-mFAP tumors by flow cytometry.** Representative bivariate density plots show gating strategy to identify the PMN-MDSC, Mo-MDSC, TAM and T-cells in the MCA205-mFAP tumors (A). Marker sets used to identify each immune cell type are listed (B).

A

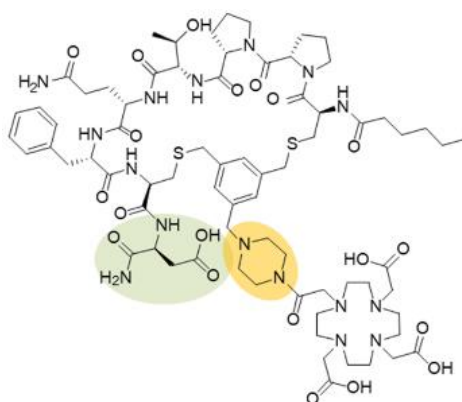

B

| Binding of FAP-2287 and <sup>nat</sup> Lu-FAP-2287 to Human and Mouse FAP by SPR      |                                                                          |                                                                          |
|---------------------------------------------------------------------------------------|--------------------------------------------------------------------------|--------------------------------------------------------------------------|
| <b>Compound</b>                                                                       | <b>Human FAP <math>K_D</math><br/>(nM, mean <math>\pm</math> SD)</b>     | <b>Mouse FAP <math>K_D</math><br/>(nM, mean <math>\pm</math> SD)</b>     |
| FAP-2287                                                                              | 0.4 $\pm$ 0.1                                                            | 1.2 $\pm$ 0.2                                                            |
| <sup>nat</sup> Lu-FAP-2287                                                            | 0.1 $\pm$ 0.0                                                            | 0.5 $\pm$ 0.1                                                            |
| Inhibition of Human and Mouse FAP Endopeptidase Activity Assay                        |                                                                          |                                                                          |
| <b>Compound</b>                                                                       | <b>Human FAP <math>IC_{50}</math><br/>(nM, mean <math>\pm</math> SD)</b> | <b>Mouse FAP <math>IC_{50}</math><br/>(nM, mean <math>\pm</math> SD)</b> |
| FAP-2287                                                                              | 1.4 $\pm$ 0.3                                                            | 5.1 $\pm$ 0.5                                                            |
| <sup>nat</sup> Lu-FAP-2287                                                            | 1.3 $\pm$ 0.3                                                            | 3.3 $\pm$ 0.4                                                            |
| Inhibition of Human DPP4 and PREP Endopeptidase Activity Assay                        |                                                                          |                                                                          |
| <b>Compound</b>                                                                       | <b>Human DPP4 <math>IC_{50}</math><br/>(nM, mean)</b>                    | <b>Human PREP <math>IC_{50}</math><br/>(nM, mean)</b>                    |
| FAP-2287                                                                              | >10000                                                                   | >1000                                                                    |
| <sup>nat</sup> Lu-FAP-2287                                                            | >10000                                                                   | >1000                                                                    |
| Binding of FAP-2287 and <sup>nat</sup> Lu-FAP-2287 to Human FAP in a Cell Based Assay |                                                                          |                                                                          |
| <b>Compound</b>                                                                       | <b>Human FAP <math>IC_{50}</math><br/>(nM, mean <math>\pm</math> SD)</b> |                                                                          |
| FAP-2287                                                                              | 3.9 $\pm$ 1.0                                                            |                                                                          |
| <sup>nat</sup> Lu-FAP-2287                                                            | 2.3 $\pm$ 0.3                                                            |                                                                          |
| Plasma Stability (24 h)                                                               |                                                                          |                                                                          |
| <b>Compound</b>                                                                       | <b>Human Plasma<br/>(%)</b>                                              | <b>Mouse Plasma<br/>(%)</b>                                              |
| FAP-2287                                                                              | >80                                                                      | >80                                                                      |
| <sup>nat</sup> Lu-FAP-2287                                                            | >80                                                                      | >80                                                                      |

$K_D$ , equilibrium dissociation constant;  $IC_{50}$ , half-maximal inhibitory concentration; SD, standard deviation; SPR, surface plasmon resonance

Supplementary Figure S2. FAP-2287 structure (A) and *in vitro* characterization of FAP-2287 and <sup>nat</sup>Lu-FAP-2287 summary table (B).

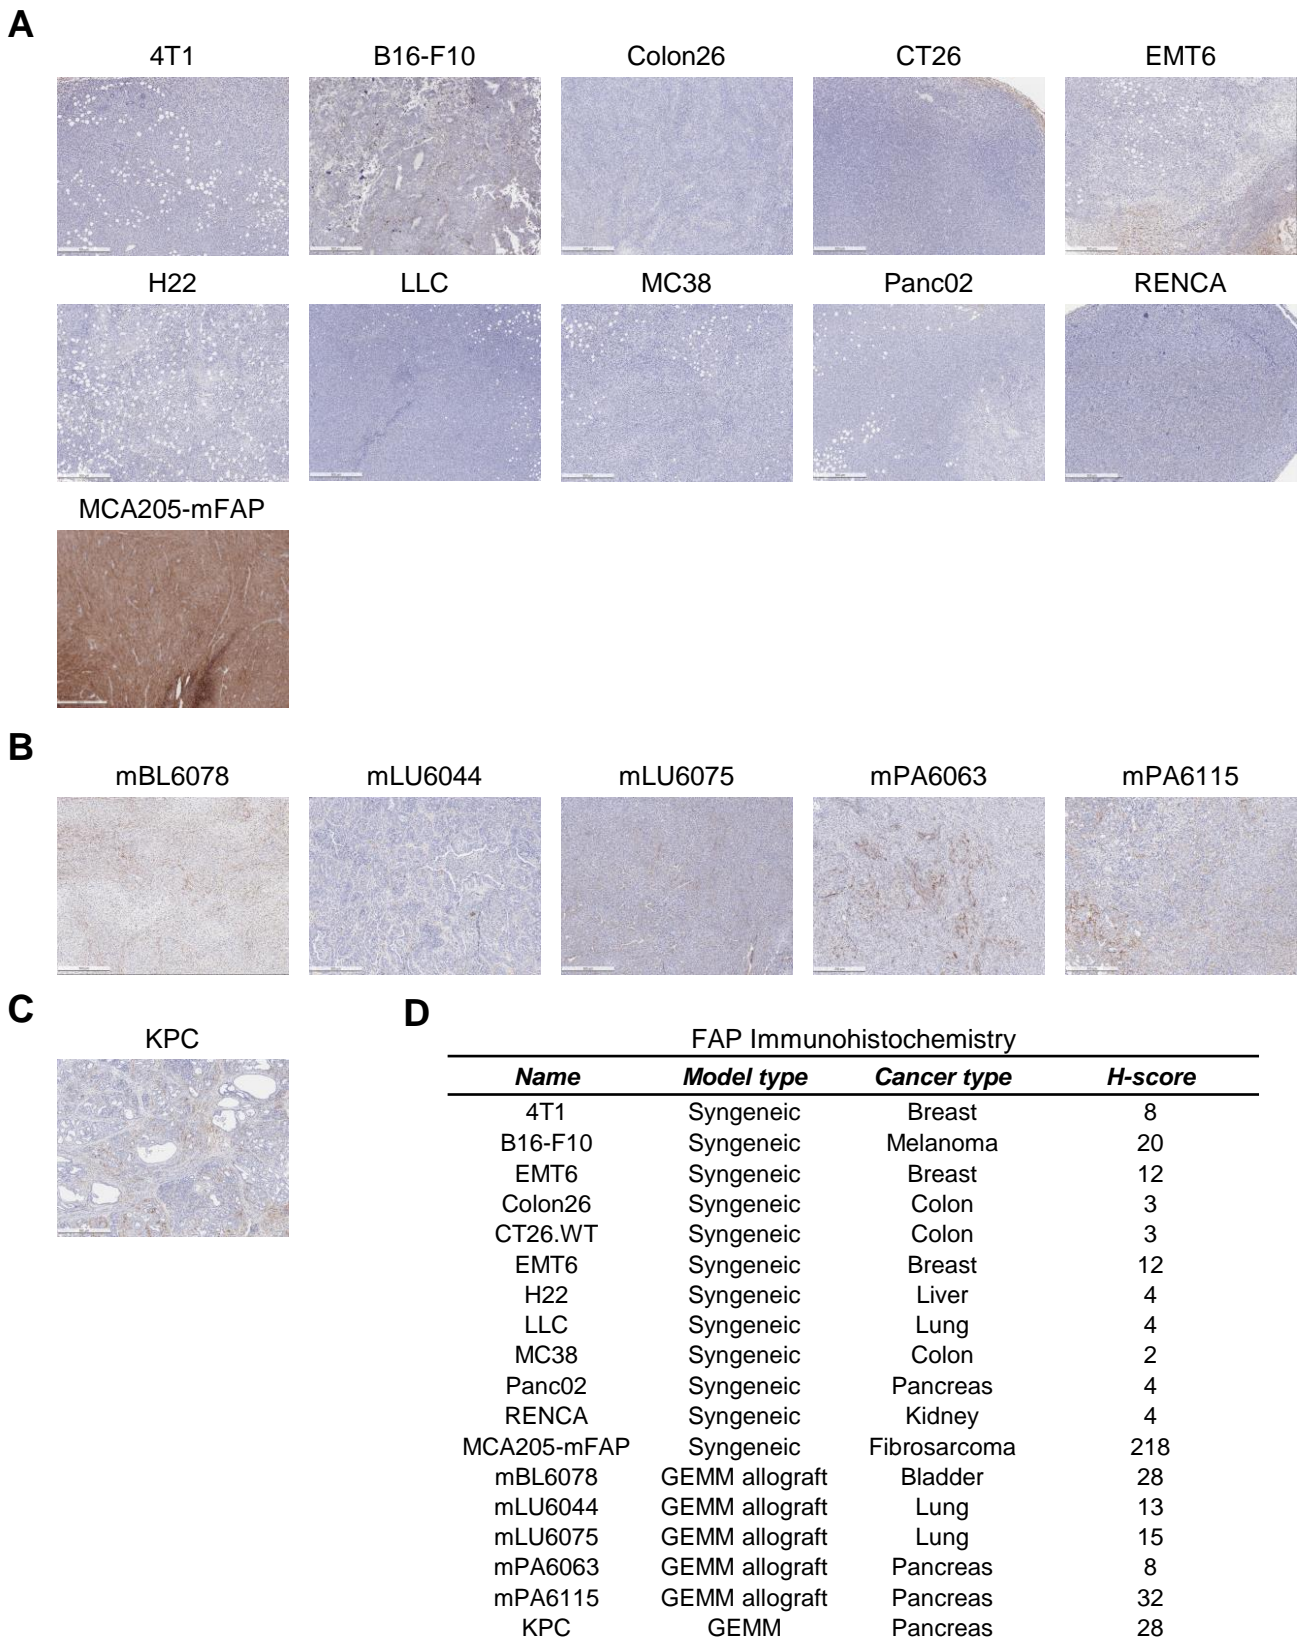

**Supplementary Figure S3. FAP immunohistochemistry analysis of syngeneic, GEMM allograft, and GEMM tumors.** Representative images show FAP staining in syngeneic (A, 500 µm), GEMM allograft (B, 500 µm), and GEMM tumors (C, 500 µm). Summary table of tumors with FAP quantification is shown (D).

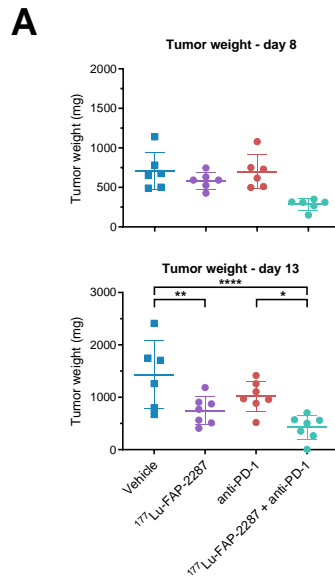**B**

| Parameter         | Time point | Treatments     |                            |                |                                        |
|-------------------|------------|----------------|----------------------------|----------------|----------------------------------------|
|                   |            | Vehicle        | <sup>177</sup> Lu-FAP-2287 | anti-PD-1      | <sup>177</sup> Lu-FAP-2287 + anti-PD-1 |
| Tumor weight (mg) | Day 8      | 706.8 ± 97.7   | 586.2 ± 43.4               | 698.2 ± 87.6   | 284.7 ± 28.8                           |
|                   | Day 13     | 1432.8 ± 267.1 | 746.0 ± 102.2**            | 1016.6 ± 108.6 | 423.9 ± 88.7****                       |

**Supplementary Figure S4. Tumor weight after treatment with <sup>177</sup>Lu-FAP-2287 and in combination with anti-PD-1 in MCA205-mFAP syngeneic tumor model.** In the pharmacodynamic study, individual tumor weights on days 8 and 13 pi with bars as mean ± SEM (A) with the summary table of the data (B) are shown. Significant changes compared to vehicle in the summary table and between groups in the graph are denoted as \* p<0.05, \*\* p<0.01, \*\*\* p<0.001 and \*\*\*\* p<0.0001.

A

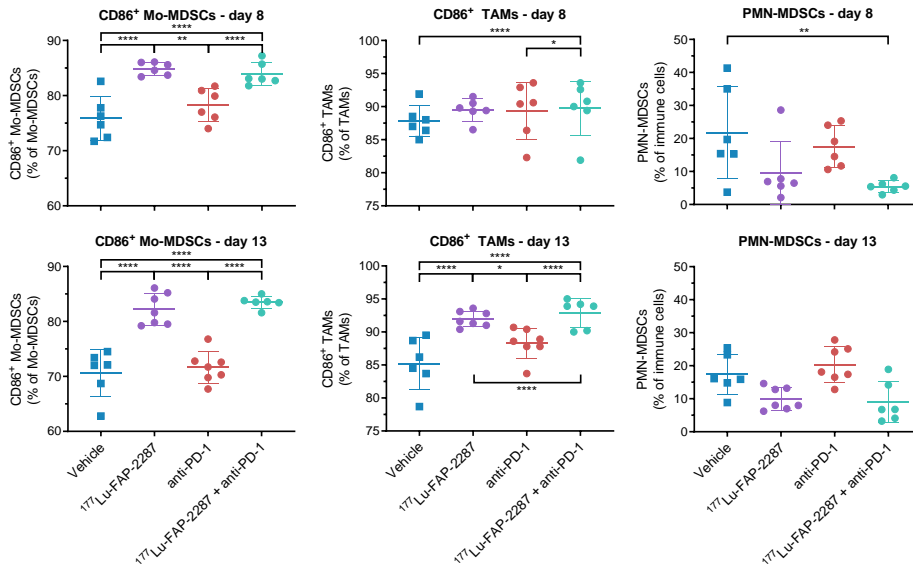

B

| Immune population                       | Time point | Treatments |                            |            |                                               |
|-----------------------------------------|------------|------------|----------------------------|------------|-----------------------------------------------|
|                                         |            | Vehicle    | $^{177}\text{Lu-FAP-2287}$ | anti-PD-1  | $^{177}\text{Lu-FAP-2287} + \text{anti-PD-1}$ |
| CD86 <sup>+</sup> Mo-MDSCs (% Mo-MDSCs) | Day 8      | 75.9 ± 4.0 | 84.9 ± 1.2****             | 78.3 ± 3.0 | 83.9 ± 2.1***                                 |
|                                         | Day 13     | 70.6 ± 4.3 | 82.2 ± 2.9****             | 71.7 ± 2.9 | 83.5 ± 1.1****                                |
| CD86 <sup>+</sup> TAMs (% TAMs)         | Day 8      | 87.8 ± 2.4 | 89.5 ± 1.7                 | 89.4 ± 4.3 | 89.7 ± 4.1                                    |
|                                         | Day 13     | 85.2 ± 3.9 | 92.0 ± 1.2**               | 88.3 ± 2.3 | 92.9 ± 2.2**                                  |
| PMN-MDSCs (% CD45 <sup>+</sup> )        | Day 8      | 21.7 ± 5.7 | 9.6 ± 3.9                  | 17.5 ± 2.6 | 5.4 ± 0.7**                                   |
|                                         | Day 13     | 17.4 ± 2.5 | 10.0 ± 1.3                 | 20.3 ± 2.1 | 9.0 ± 2.5                                     |

C

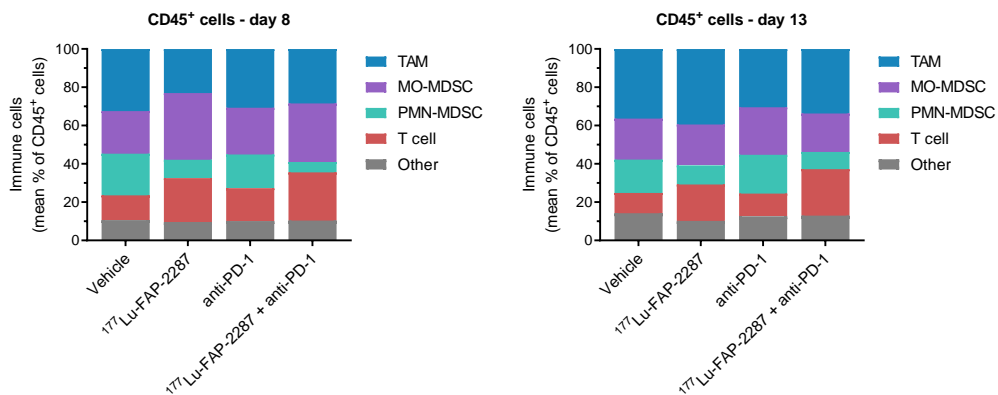

**Supplementary Figure S5. Immune profiling of CD86<sup>+</sup> Mo-MDSCs, CD86<sup>+</sup> TAMs and PMN-MDSCs after treatment with  $^{177}\text{Lu-FAP-2287}$  and in combination with anti-PD-1 in MCA205-mFAP syngeneic tumor model.** Individual percentage of CD86<sup>+</sup> Mo-MDSCs, CD86<sup>+</sup> TAMs and PMN-MDSCs with bars as mean ± SEM on day 8 and 13 pi (A), and a summary table (B) are shown. Mean percentages of lymphoid and myeloid subsets are plotted as stacked bars to denote changes relative to each population on day 8 (C, left) and 13 pi (C, right). Significant changes compared to vehicle in the summary table and between groups in the graph are denoted as \*  $p < 0.05$ , \*\*  $p < 0.01$ , \*\*\*  $p < 0.001$  and \*\*\*\*  $p < 0.0001$ .

**A**

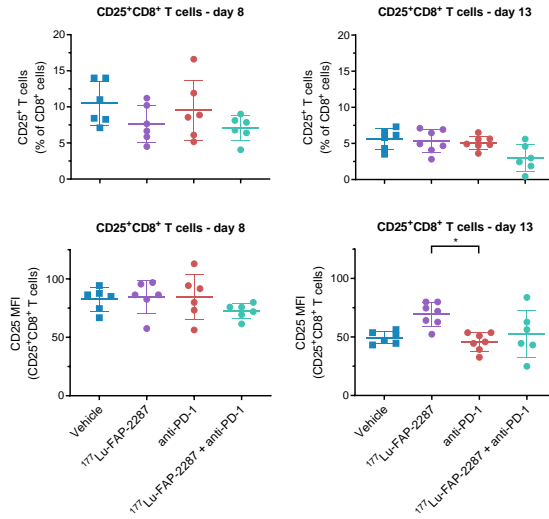

**B**

| Immune population                                           | Time point | Treatments |                            |           |                                        |
|-------------------------------------------------------------|------------|------------|----------------------------|-----------|----------------------------------------|
|                                                             |            | Vehicle    | <sup>177</sup> Lu-FAP-2287 | anti-PD-1 | <sup>177</sup> Lu-FAP-2287 + anti-PD-1 |
| CD25 <sup>+</sup> CD8 <sup>+</sup> (% of CD8 <sup>+</sup> ) | Day 8      | 10.5 ± 1.2 | 7.7 ± 1.1                  | 9.5 ± 1.7 | 7.0 ± 0.7                              |
|                                                             | Day 13     | 5.6 ± 0.6  | 5.3 ± 0.6                  | 5.1 ± 0.3 | 3.0 ± 0.8                              |
| CD25 on CD25 <sup>+</sup> CD8 <sup>+</sup> (MFI)            | Day 8      | 82 ± 4     | 84 ± 6                     | 85 ± 8    | 72 ± 3                                 |
|                                                             | Day 13     | 49 ± 2     | 70 ± 4                     | 46 ± 3    | 53 ± 8                                 |

**Supplementary Figure S6. Immune profiling of CD25<sup>+</sup>CD8<sup>+</sup> T cells after treatment with <sup>177</sup>Lu-FAP-2287 and in combination with anti-PD-1 in MCA205-mFAP syngeneic tumor model.** Individual percentage of CD25<sup>+</sup>CD8<sup>+</sup> and their CD25 MFI with bars as mean ± SEM on day 8 and 13 pi (A), and a summary table (B) are shown. Significant changes compared to vehicle in the summary table and between groups in the graph are denoted as \* p<0.05, \*\* p<0.01, \*\*\* p<0.001 and \*\*\*\* p<0.0001.

A

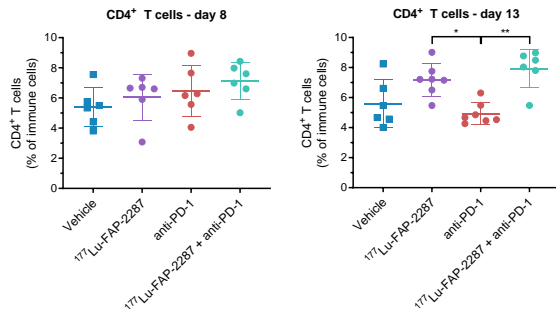

B

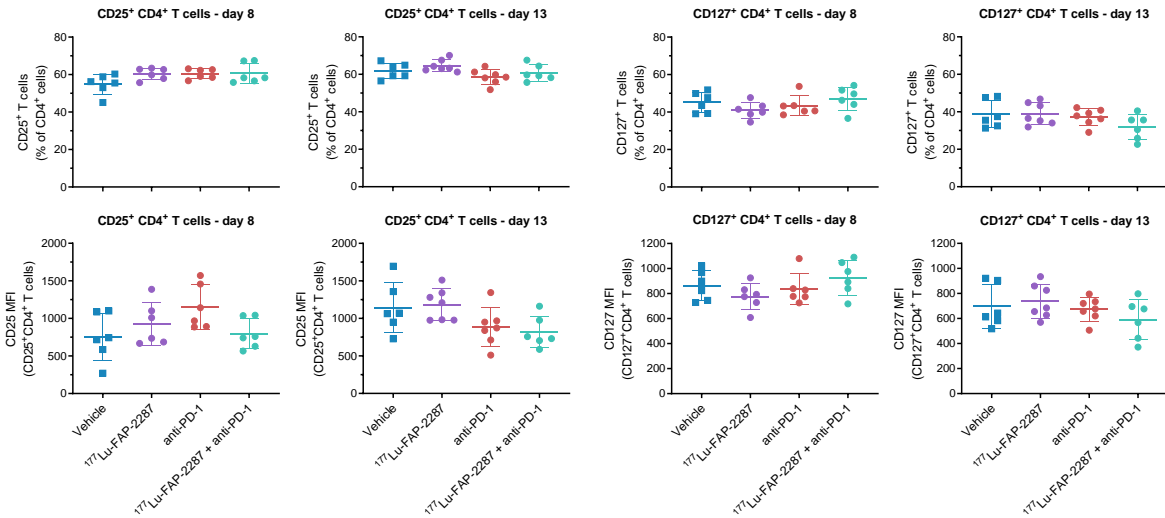

C

Treatments

| <i>Immune population</i>                                    | <i>Time point</i> | <i>Vehicle</i> | <i><sup>177</sup>Lu-FAP-2287</i> | <i>anti-PD-1</i> | <i><sup>177</sup>Lu-FAP-2287 + anti-PD-1</i> |
|-------------------------------------------------------------|-------------------|----------------|----------------------------------|------------------|----------------------------------------------|
| CD4 <sup>+</sup> (% , CD45 <sup>+</sup> )                   | Day 8             | 5.4 ± 0.5      | 6.0 ± 0.6                        | 6.4 ± 0.7        | 7.1 ± 0.5                                    |
|                                                             | Day 13            | 5.6 ± 0.6      | 7.2 ± 0.4                        | 4.9 ± 0.3        | 7.9 ± 0.5                                    |
| CD25 <sup>+</sup> CD4 <sup>+</sup> (% , CD4 <sup>+</sup> )  | Day 8             | 54.8 ± 2.2     | 60.4 ± 1.3                       | 60.4 ± 1.1       | 60.6 ± 2.2                                   |
|                                                             | Day 13            | 61.8 ± 1.7     | 64.5 ± 1.2                       | 58.5 ± 1.5       | 60.8 ± 1.8                                   |
| CD25 on CD4 <sup>+</sup> (MFI)                              | Day 8             | 750 ± 128      | 931 ± 117                        | 1153 ± 121       | 796 ± 83                                     |
|                                                             | Day 13            | 1144 ± 138     | 1182 ± 80                        | 885 ± 97         | 820 ± 86                                     |
| CD127 <sup>+</sup> CD4 <sup>+</sup> (% , CD4 <sup>+</sup> ) | Day 8             | 45.2 ± 2.2     | 41.0 ± 1.8                       | 43.3 ± 2.2       | 47.1 ± 2.6                                   |
|                                                             | Day 13            | 38.8 ± 3.0     | 38.9 ± 2.2                       | 37.1 ± 1.7       | 31.8 ± 2.7                                   |
| CD127 on CD4 <sup>+</sup> (MFI)                             | Day 8             | 864 ± 48       | 777 ± 43                         | 837 ± 51         | 927 ± 57                                     |
|                                                             | Day 13            | 697 ± 70       | 736 ± 51                         | 673 ± 35         | 591 ± 66                                     |

**Supplementary Figure S7. Immune profiling of CD4<sup>+</sup> T cells after treatment with <sup>177</sup>Lu-FAP-2287 and in combination with anti-PD-1 in MCA205-mFAP syngeneic tumor model.** Individual percentage of CD4<sup>+</sup> T cells with bars as mean ± SEM on day 8 and 13 pi (A), individual percentage of CD25<sup>+</sup>CD4<sup>+</sup> and CD127<sup>+</sup>CD4<sup>+</sup> cells and their CD25 and CD127 MFI with bars as mean ± SEM on day 8 and 13 pi (B), and a summary table (C) are shown. Significant changes compared to vehicle in the summary table and between groups in the graph are denoted as \* p<0.05, \*\* p<0.01, \*\*\* p<0.001 and \*\*\*\* p<0.0001.

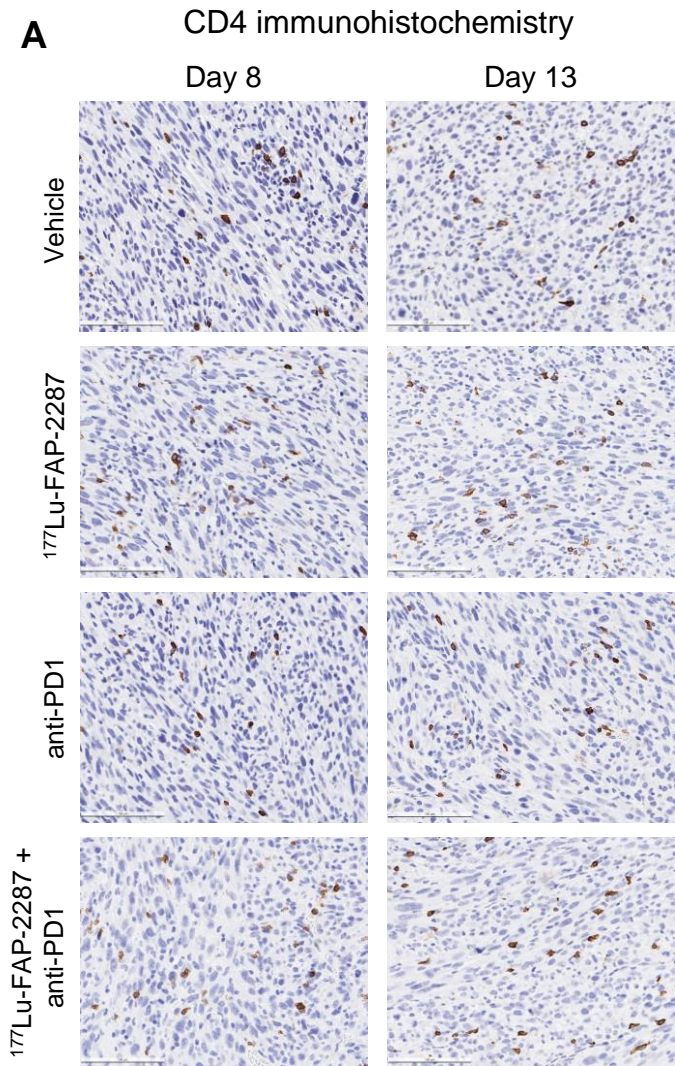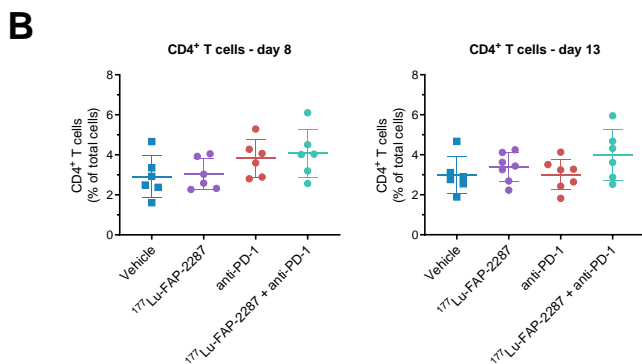

**Supplementary Figure S8. IHC analysis of CD4<sup>+</sup> T cells after treatment with  $^{177}\text{Lu-FAP-2287}$  and in combination with anti-PD-1 in MCA205-mFAP syngeneic tumor model.** Representative images show CD4 staining in MCA205-mFAP tumors (A, 100  $\mu\text{m}$ ) and individual percentage of CD4<sup>+</sup> T cells by IHC quantification with bars as mean  $\pm$  SEM are plotted for days 8 and 13 pi (B). Significant changes between groups are denoted as \*  $p < 0.05$ , \*\*  $p < 0.01$ , \*\*\*  $p < 0.001$  and \*\*\*\*  $p < 0.0001$ .



**A**

| <i>Treatment and time point</i>             |    | <i>Treatment and time point</i>              | <i>Shared genes</i> |
|---------------------------------------------|----|----------------------------------------------|---------------------|
| <sup>177</sup> Lu-FAP-2287 Day 8            | vs | <sup>177</sup> Lu-FAP-2287 + anti-PD1 Day 8  | 40                  |
| <sup>177</sup> Lu-FAP-2287 Day 8            | vs | <sup>177</sup> Lu-FAP-2287 Day 13            | 16                  |
| <sup>177</sup> Lu-FAP-2287 Day 13           | vs | <sup>177</sup> Lu-FAP-2287 + anti-PD1 Day 13 | 9                   |
| <sup>177</sup> Lu-FAP-2287 + anti-PD1 Day 8 | vs | <sup>177</sup> Lu-FAP-2287 + anti-PD1 Day 13 | 27                  |

**B**<sup>177</sup>Lu-FAP-2287 + anti-PD-1 vs <sup>177</sup>Lu-FAP-2287 (Day 8)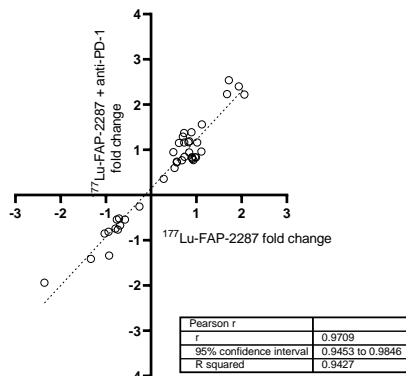**C**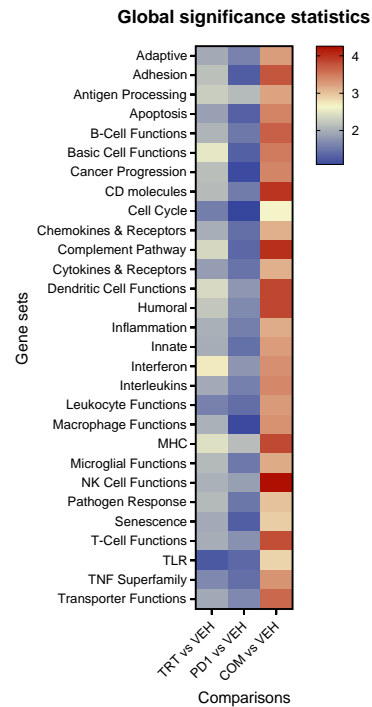

**Supplementary Figure S9. Expression analysis of MCA205-mFAP tumors after treatment with <sup>177</sup>Lu-FAP-2287 and in combination with anti-PD-1.** Comparison of genes that were significantly changed from vehicle control ( $P < 0.05$ ) show number of shared genes between <sup>177</sup>Lu-FAP-2287 and the combination with anti-PD-1 and between different timepoints (A). Comparison of fold changes to vehicle control for differentially expressed genes shared between single agent <sup>177</sup>Lu-FAP-2287 versus the combination with anti-PD-1 treatment show direct correlation with Pearson  $r$  of 0.9709 (B). Heatmap of global significance statistics for immune gene sets is shown for the different comparisons to vehicle control on day 8 pi (C). VEH, vehicle; TRT, <sup>177</sup>Lu-FAP-2287; PD1, anti-PD-1, COM, combination.

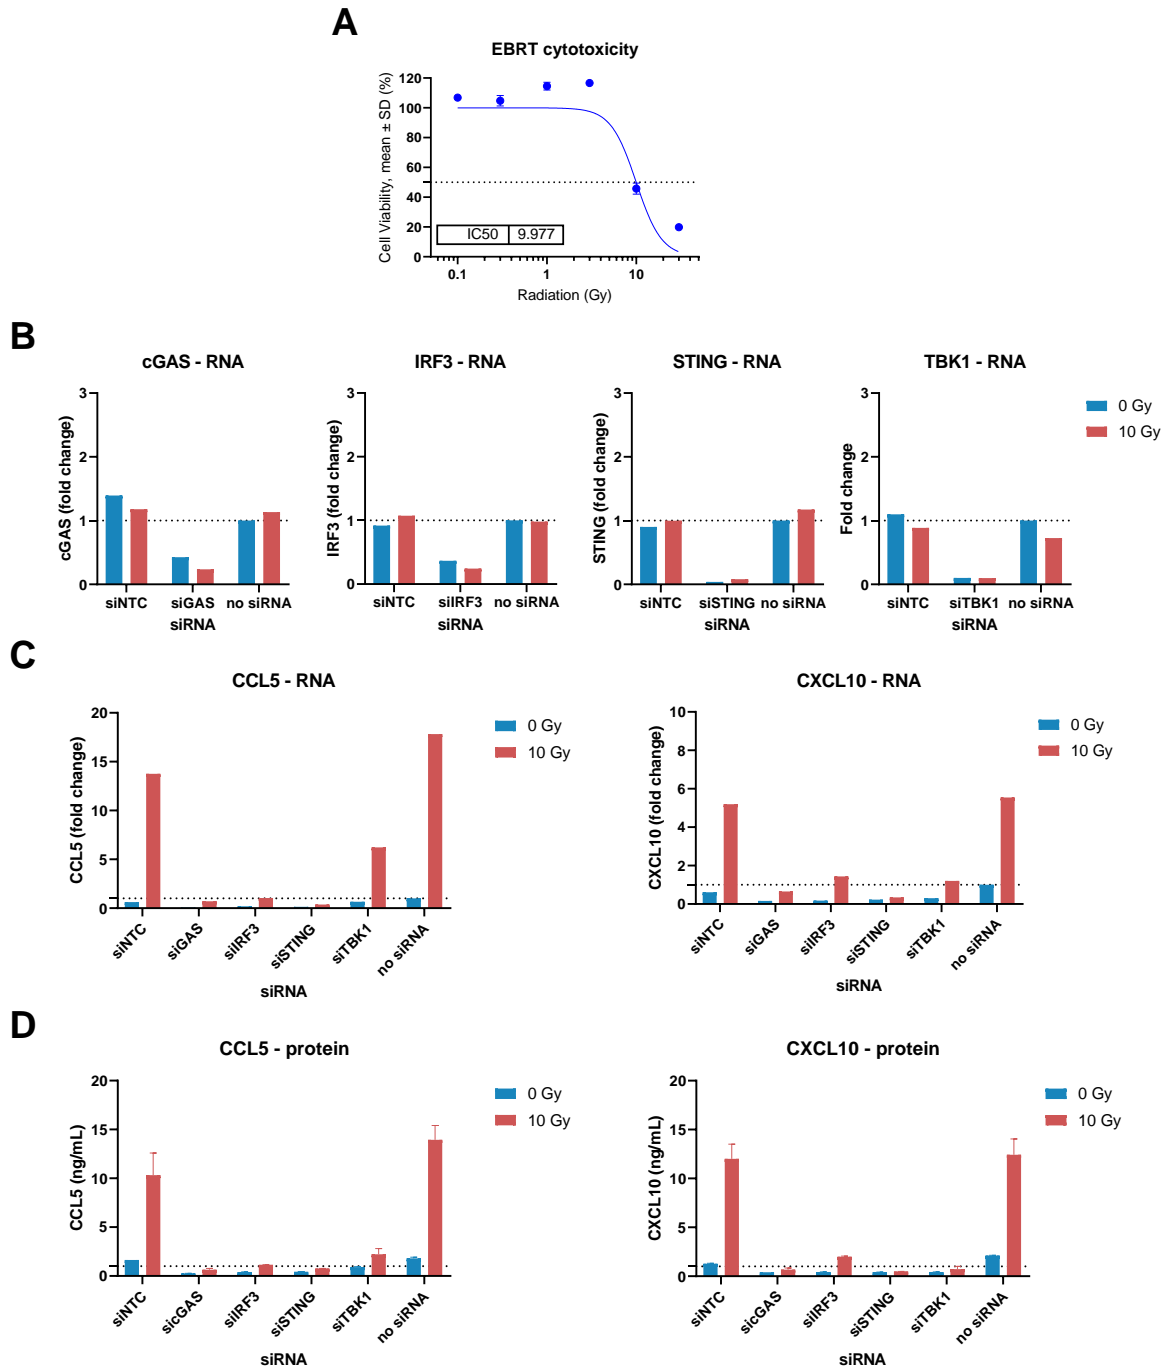

**Supplementary Figure S10. Confirmation of STING pathway activation by radiation leads to upregulation of chemokines CCL5 and CXCL10 in MCA205-mFAP cells.** The dose-response curve of MCA205-mFAP cells evaluated by cell viability at the indicated radiation doses. Data represent the mean  $\pm$  SD performed in quadruplicate (A). Fold change in RNA expression of cGAS, IRF3, STING, and TBK1 after EBRT, in cells transfected with siRNA of the respective genes (B). Fold change in RNA expression of CCL5 and CXCL10 after EBRT, in cells transfected with siRNA of the STING pathway genes (C). CCL5 and CXCL10 cytokines levels in cultured supernatant, from cells transfected with siRNA of the STING pathway genes after EBRT (D).
